# Supplementary material for: Fe3+-induced bioinspired chitosan hydrogels for the sustained and controlled release of doxorubicin
Source: Royal Society of Chemistry journal article supplement (doi:10.1039/c6ra07369g), 2016-01-01
Supplement: c6ra07369g1.pdf [file c6ra07369g1.pdf]

**Supporting Information for:**

**Fe<sup>3+</sup>-induced bioinspired chitosan hydrogels for the sustained and  
controlled release of doxorubicin**

Jinmao Zhang,<sup>a</sup> Xinyi Tao,<sup>a</sup> Jianwen Liu,<sup>b</sup> Dongzhi Wei<sup>a</sup> and Yuhong Ren<sup>\*a</sup>

<sup>a</sup>State Key Laboratory of Bioreactor Engineering, New World Institute of Biotechnology, East China University of Science and Technology, Shanghai 200237, China. E-mail: yhren@ecust.edu.cn; Fax: +86 21 6425 0068; Tel: +86 21 6425 2163

<sup>b</sup>School of Pharmacy of East China University of Science and Technology, Shanghai 200237, China

### Scheme S1

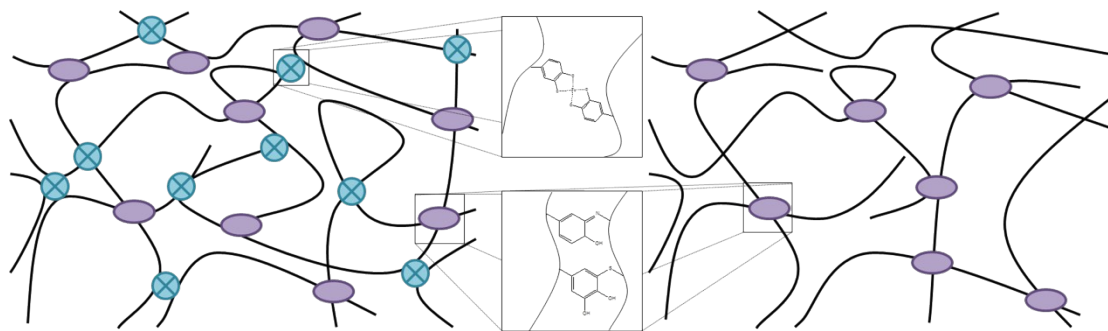

**Scheme S1** The mechanism of crosslinking in the  $\text{Fe}^{3+}$ -induced CCS-NACCS hydrogel (left) and  $\text{IO}_4^-$ -induced CCS-NACCS hydrogel (right).

**Fig. S1**

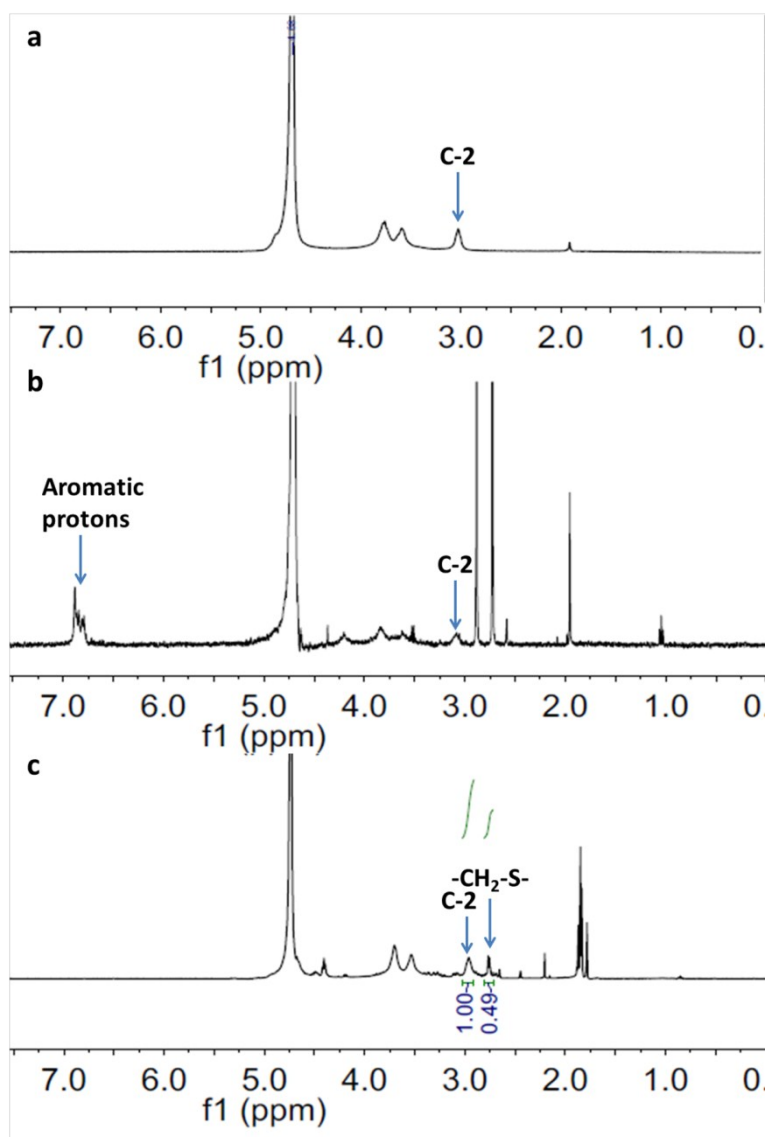

**Fig. S1**  $^1\text{H}$  NMR spectra of CS (a), CCS (b) and NACCS (c). Solvent:  $\text{D}_2\text{O}$  containing 1% DCl .

**Fig. S2**

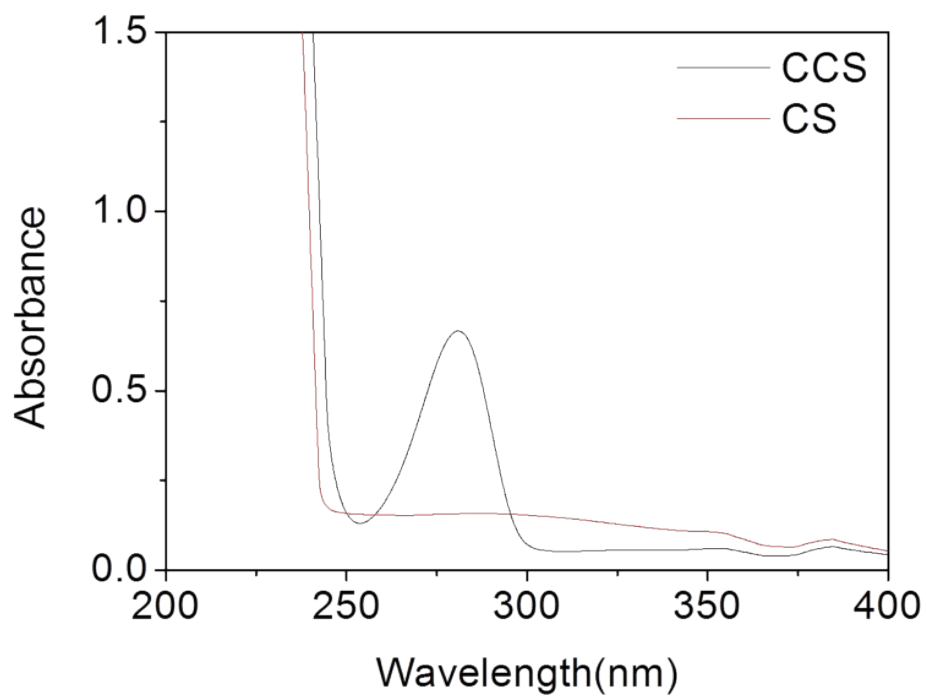

**Fig. S2** UV-vis spectra of CS and CCS.

**Fig. S3**

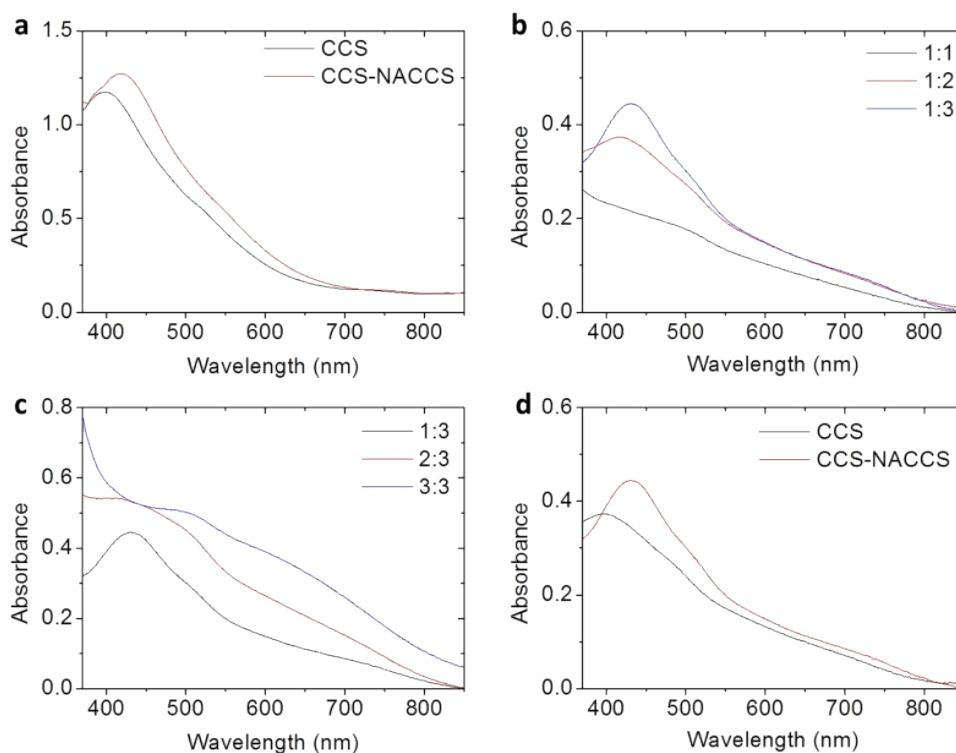

**Fig. S3** UV-vis spectra of NaIO<sub>4</sub>-CCS-NACCS and NaIO<sub>4</sub>-CCS (a), FeCl<sub>3</sub>-CCS-NACCS at different molar ratio of Fe<sup>3+</sup> and catechol (b, c), FeCl<sub>3</sub>-CCS-NACCS and FeCl<sub>3</sub>-CCS (d) in a 1% acetic acid solution.

### UV-vis spectroscopy

Fe<sup>3+</sup>-induced covalent and coordinate interactions were monitored on a UV-vis spectrophotometer (U-5100, Hitachi, Tokyo, Japan) using a quartz cuvette with a path length of 1 cm according to previous reports.<sup>1, 2</sup> All samples were initially blanked against a 1% acetic acid solution (v/v). Solutions were obtained by mixing 50  $\mu$ L of the appropriate CCS solution (catechol concentration: 49.5 mM, 33.0 mM, 16.5 mM), 15  $\mu$ L of the appropriate NACCS solution (thiol concentration: 55.0 mM, 36.7 mM, 18.3 mM), and 5  $\mu$ L of the corresponding FeCl<sub>3</sub> or NaIO<sub>4</sub> solution (165 mM, 330 mM, 495 mM) in 2 mL of a 1% acetic acid solution. The solutions were thoroughly mixed before testing.

### References:

- 1 Z. Guo, K. Ni, D. Wei and Y. Ren, *RSC Adv.*, 2015, **5**, 37377-37384
- 2 N. Holten-Andersen, M. J. Harrington, H. Birkedal, B. P. Lee, P. B. Messersmith, K. Y. C. Lee and J. H. Waite, *Proc. Natl. Acad. Sci. U. S. A.*, 2011, **108**, 2651-2655.

**Fig. S4**

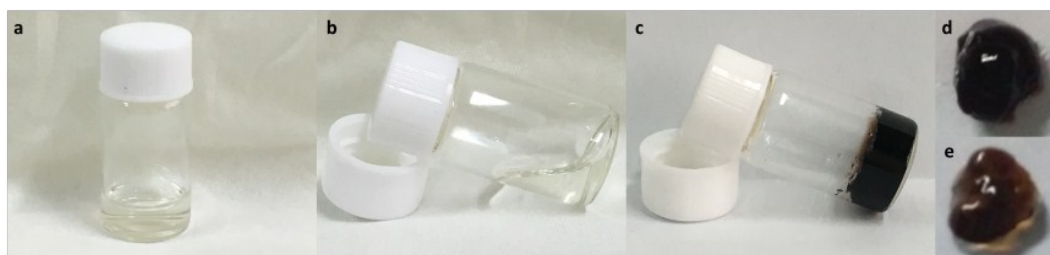

**Fig. S4** Photos of  $\text{Fe}^{3+}$ -induced hydrogel before (a, b) and after gelation (c); photos of the  $\text{Fe}^{3+}$ -induced hydrogel (d) and  $\text{IO}_4^-$ -induced hydrogel (e).

**Fig. S5**

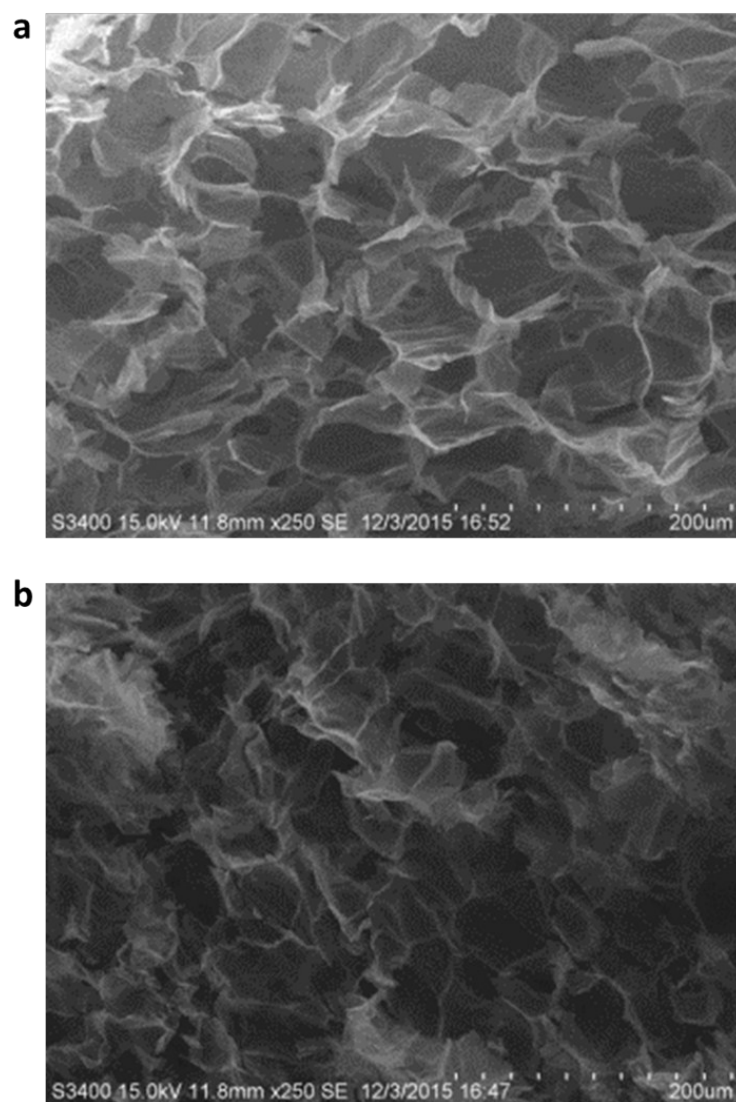

**Fig. S5** SEM images of the Fe<sup>3+</sup>-induced CCS hydrogel (a) and CCS-NACCS hydrogel (b).

**Fig. S6**

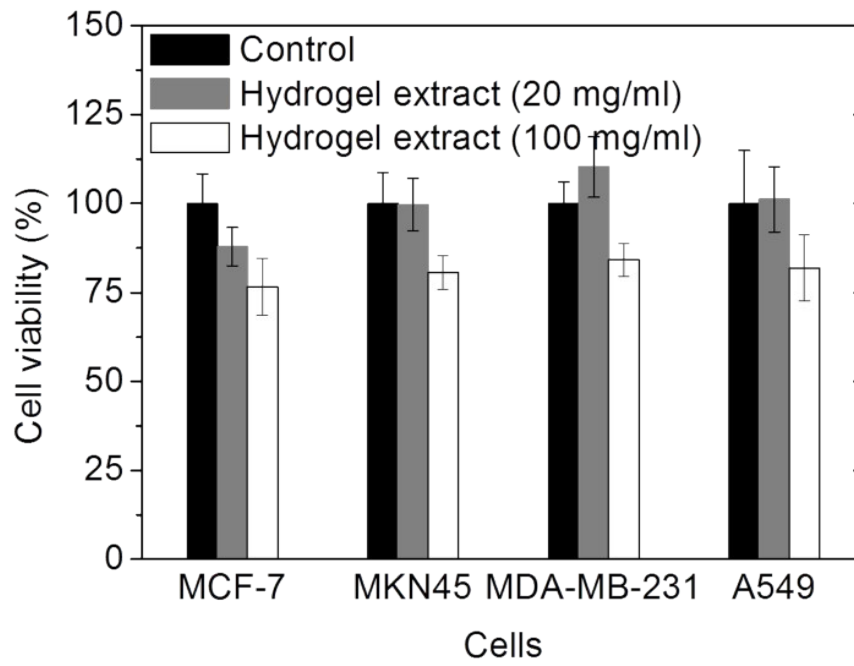

**Fig. S6** Cytotoxicity test of an Fe<sup>3+</sup>-induced CCS-NACCS hydrogel for different cell lines.



**Fig. S7**

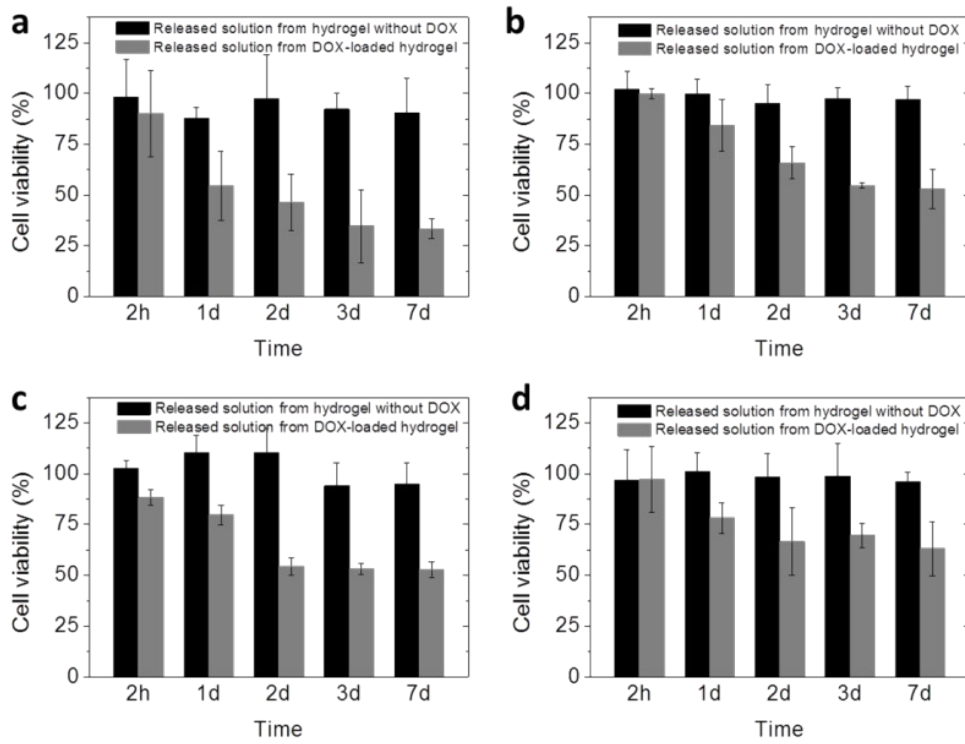

**Fig. S7** The viability of MCF-7 cells (a), MKN45 cells (b), MDA-MB-231 cells (c) and A549 cells (d) incubated with released solutions from DOX-loaded CCS-NACCS hydrogels and CCS-NACCS hydrogels without DOX at various release time points based on the MTT assay.

**Table S1** Synthesis of CCS with different DSs.

| Conjugate | The molar ratio of CS             |             | Yield(%) |
|-----------|-----------------------------------|-------------|----------|
|           | and 3,4-dihydroxy<br>benzaldehyde | DS(%)       |          |
| CCS-1     | 1:0.6                             | 40.7 ± 0.40 | 81.6     |
| CCS-2     | 1:0.8                             | 62.4 ± 0.26 | 71.7     |
| CCS-3     | 1:3.0                             | 77.7 ± 0.47 | 72.1     |

**Table S2** Summary of the drug loading efficiency (DLE), drug loading capacity (DLC), diffusional exponent (n), and correlation coefficient (R<sup>2</sup>).

| pH  | DLE (%)     | DLC<br>(mg DOX/g<br>hydrogel) | Diffusional<br>exponent,<br>n | R <sup>2</sup> |
|-----|-------------|-------------------------------|-------------------------------|----------------|
| 7.4 | 99.5 ± 0.26 | 0.998 ± 0.0062                | 0.1326                        | 0.8301         |
| 6.8 | 98.8 ± 0.15 | 0.991 ± 0.0046                | 0.1492                        | 0.8837         |
| 5.0 | 99.3 ± 0.17 | 0.996 ± 0.0072                | 0.2426                        | 0.9876         |

**Table S3** The half maximal inhibitory concentration ( $IC_{50}$ ) of free DOX and the DOX-loaded hydrogel for different cell lines.

| Cell lines | $IC_{50}$ of free DOX ( $\mu\text{g}/\text{mL}$ ) | $IC_{50}$ of the DOX-loaded hydrogel ( $\text{mg}/\text{mL}$ )   |
|------------|---------------------------------------------------|------------------------------------------------------------------|
| NCI-H460   | $4.8 \pm 0.31$                                    | $11.5 \pm 0.38$<br>( $5.1 \pm 0.17 \mu\text{g DOX}/\text{mL}$ )  |
| MCF-7      | $6.2 \pm 0.35$                                    | $16.6 \pm 0.98$<br>( $7.4 \pm 0.44 \mu\text{g DOX}/\text{mL}$ )  |
| MKN45      | $6.3 \pm 0.25$                                    | $19.8 \pm 0.85$<br>( $8.8 \pm 0.38 \mu\text{g DOX}/\text{mL}$ )  |
| MDA-MB-231 | $8.4 \pm 0.40$                                    | $18.7 \pm 0.67$<br>( $8.3 \pm 0.30 \mu\text{g DOX}/\text{mL}$ )  |
| A549       | $12.5 \pm 0.21$                                   | $30.7 \pm 0.87$<br>( $13.7 \pm 0.39 \mu\text{g DOX}/\text{mL}$ ) |
| Hela       | $20.2 \pm 1.06$                                   |                                                                  |
| SKOV-3     | $37.1 \pm 1.25$                                   |                                                                  |
